# Supplementary material for: Translating genomics into practice for real-time surveillance and response to carbapenemase-producing Enterobacteriaceae: evidence from a complex multi-institutional KPC outbreak
Source: PeerJ. 2018 Jan 3;6:e4210. doi: 10.7717/peerj.4210 (PMC5756455; doi:10.7717/peerj.4210)
Supplement: Supplemental Information 1 [file peerj-06-4210-s001.pdf]

**Translating genomics into practice for real-time surveillance and  
response to carbapenemase-producing Enterobacteriaceae:  
evidence from a complex multi-institutional KPC outbreak**

Kwong JC <sup>1,2,3</sup>, Lane C <sup>2,4</sup>, Romanes F <sup>4</sup>, Gonçalves da Silva A <sup>1,2</sup>, Easton M<sup>4</sup>, Cronin K <sup>5</sup>,  
Waters MJ <sup>5</sup>, Tomita T <sup>2</sup>, Stevens K <sup>2</sup>, Schultz M <sup>1,2</sup>, Baines S <sup>1,2</sup>, Sherry NL <sup>2,3</sup>, Carter G <sup>1</sup>,  
Mu A <sup>1</sup>, Sait M <sup>2</sup>, Ballard S <sup>1,2</sup>, Seemann T <sup>1,2,6</sup>, Stinear TP <sup>1</sup> & Howden BP <sup>1,2,3</sup>.

<sup>1</sup> Doherty Applied Microbial Genomics, and <sup>2</sup> Microbiological Diagnostic Unit Public Health  
Laboratory, Department of Microbiology and Immunology, The University of Melbourne at  
The Peter Doherty Institute for Infection & Immunity, Melbourne, Australia

<sup>3</sup> Department of Infectious Diseases, Austin Health, Heidelberg, Australia

<sup>4</sup> Communicable Diseases Branch, Department of Health & Human Services, Victoria State  
Government, Melbourne, Australia

<sup>5</sup> Department of Microbiology, St Vincent's Hospital Melbourne, Fitzroy, Australia

<sup>6</sup> Melbourne Bioinformatics, Carlton, Australia

## **Supplementary Appendix**

**Table S1:** List of primers used for detection of carbapenemase genes. Carbapenemase genes were detected in suspected CPE isolates with a multiplex PCR using the primers listed. Reported genotypes were confirmed by Sanger sequencing.

| Gene/Target                         | Primer                 | Primer sequence (5' -3')                                      | PCR product size (bp) | Reference |
|-------------------------------------|------------------------|---------------------------------------------------------------|-----------------------|-----------|
| <i>bla<sub>KPC</sub></i>            | KpcF<br>KpcR           | ATG TCA CTG TAT CGC CGT C<br>TTA CTG CCC GTT GAC GCC-3'       | 845                   | [5]       |
| <i>bla<sub>OXA-48-like</sub></i>    | OXA-48F<br>OXA-48R     | TTG GTG GCA TCG ATT ATC GG<br>GAG CAC TTC TTT TGT GAT GGC     | 743                   | [6]       |
| <i>bla<sub>IMP</sub></i>            | IMP-A<br>IMP-B         | GAA GGY GTT TAT GTT CAT AC<br>GTA MGT TTC AAG AGT GAT GC      | 587                   | [7]       |
| <i>bla<sub>VIM</sub></i>            | VIM2004-A<br>VIM2004-B | GTT TGG TCG CAT ATC GCA AC<br>AAT GCG CAG CAC CAG GAT AG      | 382                   | [7]       |
| <i>bla<sub>NDM</sub></i>            | NDM-F<br>NDM-R         | GGG CAG TCG CTT CCA ACG GT<br>GTA GTG CTC AGT GTC GGC AT      | 475                   | [8]       |
| IMP sequencing:<br>5'CS-IMP-B       | 5'CS<br>IMP-B          | GGC ATC CAA GCA GCA AG<br>GTA MGT TTC AAG AGT GAT GC          | 793                   | [7]       |
| VIM 1 amplification<br>& sequencing | Vim-1F<br>Vim-1R       | TTA TGG AGC AGC AAC GAT GT<br>CAA AAG TCC CGC TCC AAC GA      | 920                   | [9]       |
| VIM-2 amplification<br>& sequencing | Vim-2F<br>Vim-2R       | AAA GTT ATG CCG CAC TCA CC<br>TGC AAC TTC ATG TTA TGC CG      | 865                   |           |
| VIM-2 sequencing                    | Vim-2sF<br>Vim-2sR     | TCG ACG GTG ATG CGT ACG TT<br>TTG ATG TCC TTC GGG CGG CT      |                       |           |
| NDM sequencing                      | NDMLF<br>NDMLR         | ATG GAA TTG CCC AAT ATT ATG CAC<br>TCA GCG CAG CTT GTC GGC    | 813                   | [10]      |
| <i>bla<sub>MOX</sub></i>            | MOXF<br>MOXR           | GCT GCT CAA GGA GCA CAG GAT<br>CAC ATT GAC ATA GGT GTG GTG C  | 520                   | [11]      |
| <i>bla<sub>CIT</sub></i>            | CITF<br>CITR           | TGG CCA GAA CTG ACA GGC AAA<br>TTT CTC CTG AAC GTG GCT GGC    | 462                   |           |
| <i>bla<sub>DHA</sub></i>            | DHAF<br>DHAR           | AAC TTT CAC AGG TGT GCT GGG T<br>CCG TAC GCA TAC TGG CTT TGC  | 405                   |           |
| <i>bla<sub>ACC</sub></i>            | ACCF<br>ACCR           | AAC AGC CTC AGC AGC CGG TTA<br>TTC GCC GCA ATC ATC CCT AGC    | 346                   |           |
| <i>bla<sub>EBC</sub></i>            | EBCF<br>EBCR           | TCG GTA AAG CCG ATG TTG CGG<br>CTT CCA CTG CGG CTG CCA GTT    | 302                   |           |
| <i>bla<sub>FOX</sub></i>            | FOXF<br>FOXR           | AAC ATG GGG TAT CAG GGA GAT G<br>CAA AGC GCG TAA CCG GAT TGG' | 190                   |           |
| <i>bla<sub>OXA-23-like</sub></i>    | OXA-23F<br>OXA-23R     | GAT CGG ATT GGA GAA CCA GA<br>ATT TCT GAC CGC ATT TCC AT      | 5001                  | [12]      |
| <i>bla<sub>OXA-24-like</sub></i>    | OXA-24F<br>OXA-24R     | GGT TAG TTG GCC CCC TTA AA<br>AGT TGA GCG AAA AGG GGA TT      | 246                   |           |
| <i>bla<sub>OXA-51-like</sub></i>    | OXA-51F<br>OXA-51R     | TAA TGC TTT GATCGG CCT TG<br>TGG ATT GCA CTT CAT CTT GG       | 353                   |           |
| <i>bla<sub>OXA-58-like</sub></i>    | OXA-58F<br>OXA-58R     | AAG TAT TGG GGC TTG TGC TG<br>CCC CTC TGC GCT CTA CAT AC      | 599                   |           |
| <i>ISAbal</i>                       | Int1F<br>Int1R         | CAG TGG ACA TAA GCC TGT TC<br>CCC GAG GCA TAG ACT GTA         | 160                   | [13]      |

**Table S2:** List of NCBI *K. pneumoniae* genomes used for initial comparison (Figure S2).

|                  |           |                |               |
|------------------|-----------|----------------|---------------|
| KP_1084          | KP_CHS109 | KP_CHS235      | KP_MGH_19     |
| KP_1158          | KP_CHS110 | KP_CHS236      | KP_MGH_20     |
| KP_32192         | KP_CHS112 | KP_CHS82       | KP_MGH_21     |
| KP_342           | KP_CHS114 | KP_CHS85       | KP_MGH_30     |
| KP_34618         | KP_CHS115 | KP_CHS89       | KP_MGH_31     |
| KP_6234          | KP_CHS116 | KP_CHS90       | KP_MGH_32     |
| KP_ATCC_13883    | KP_CHS118 | KP_CHS91       | KP_MGH_35     |
| KP_ATCC_BAA-2146 | KP_CHS121 | KP_CHS92       | KP_MGH_36     |
| KP_BAMC_07-18    | KP_CHS122 | KP_CHS96       | KP_MGH_39     |
| KP_BIDMC85       | KP_CHS125 | KP_CHS97       | KP_MGH_40     |
| KP_BIDMC86       | KP_CHS126 | KP_CHS98       | KP_MGH_43     |
| KP_BIDMC88       | KP_CHS127 | KP_CHS99       | KP_MGH_44     |
| KP_BIDMC89       | KP_CHS132 | KP_CHS_07      | KP_MGH_45     |
| KP_BIDMC91       | KP_CHS133 | KP_CHS_11      | KP_MGH_47     |
| KP_BIDMC95       | KP_CHS134 | KP_CHS_12      | KP_MGH_48     |
| KP_BIDMC96       | KP_CHS137 | KP_CHS_17      | KP_MGH_64     |
| KP_BIDMC_1       | KP_CHS139 | KP_CHS_30      | KP_MGH_66     |
| KP_BIDMC_12C     | KP_CHS140 | KP_CHS_34      | KP_MGH_68     |
| KP_BIDMC_16      | KP_CHS144 | KP_CHS_48      | KP_MGH_73     |
| KP_BIDMC_18A     | KP_CHS147 | KP_CHS_49      | KP_MGH_78578  |
| KP_BIDMC_18C     | KP_CHS148 | KP_CHS_50      | KP_NJST258_1  |
| KP_BIDMC_22      | KP_CHS149 | KP_CHS_54      | KP_NJST258_2  |
| KP_BIDMC_23      | KP_CHS150 | KP_CHS_55      | KP_NTUH-K2044 |
| KP_BIDMC_24      | KP_CHS151 | KP_CHS_59      | KP_PMK1       |
| KP_BIDMC_25      | KP_CHS154 | KP_CHS_61      | KP_PittNDM01  |
| KP_BIDMC_2A      | KP_CHS156 | KP_CHS_63      | KP_SA1        |
| KP_BIDMC_31      | KP_CHS162 | KP_CHS_70      | KP_T69        |
| KP_BIDMC_34      | KP_CHS164 | KP_CHS_71      | KP_UCI70      |
| KP_BIDMC_35      | KP_CHS165 | KP_CHS_72      | KP_UCI76      |
| KP_BIDMC_36      | KP_CHS167 | KP_CHS_73      | KP_UCI81      |
| KP_BIDMC_42a     | KP_CHS168 | KP_CHS_76      | KP_UCI82      |
| KP_BIDMC_42b     | KP_CHS169 | KP_CHS_80      | KP_UCI91      |
| KP_BIDMC_46a     | KP_CHS174 | KP_Ecl8        | KP_UCI96      |
| KP_BIDMC_46b     | KP_CHS179 | KP_FDAARGOS_84 | KP_UCICRE_1   |
| KP_BIDMC_47      | KP_CHS185 | KP_HK787       | KP_UCICRE_10  |
| KP_BIDMC_48      | KP_CHS186 | KP_HS11286     | KP_UCICRE_13  |
| KP_BIDMC_5       | KP_CHS191 | KP_JM45        | KP_UCICRE_2   |
| KP_BIDMC_51      | KP_CHS194 | KP_KCTC_2242   | KP_UCICRE_4   |
| KP_BIDMC_52      | KP_CHS200 | KP_KP5-1       | KP_UCICRE_6   |
| KP_BIDMC_53      | KP_CHS201 | KP_KPNIH1      | KP_UCICRE_7   |
| KP_BIDMC_55      | KP_CHS202 | KP_KPNIH10     | KP_UCI_17     |
| KP_BIDMC_60      | KP_CHS205 | KP_KPNIH24     | KP_UCI_18     |
| KP_BIDMC_61      | KP_CHS207 | KP_KPNIH27     | KP_UCI_19     |
| KP_BIDMC_7B      | KP_CHS208 | KP_KPR0928     | KP_UCI_21     |
| KP_BJ1-GA        | KP_CHS210 | KP_Kp13        | KP_UCI_25     |
| KP_BWH53         | KP_CHS211 | KP_Kp52        | KP_UCI_26     |
| KP_BWH62         | KP_CHS214 | KP_LCT-KP214   | KP_UCI_34     |
| KP_BWH_2         | KP_CHS215 | KP_MGH101      | KP_UCI_41     |
| KP_BWH_22        | KP_CHS216 | KP_MGH102      | KP_UCI_42     |
| KP_BWH_28        | KP_CHS218 | KP_MGH112      | KP_UCI_43     |
| KP_BWH_30        | KP_CHS219 | KP_MGH115      | KP_UCI_56     |
| KP_BWH_41        | KP_CHS221 | KP_MGH116      | KP_UCI_59     |
| KP_BWH_46        | KP_CHS223 | KP_MGH117      | KP_UCI_62     |
| KP_CAV1344       | KP_CHS224 | KP_MGH124      | KP_WGLW1      |
| KP_CAV1392       | KP_CHS225 | KP_MGH82       | KP_WGLW2      |
| KP_CAV1596       | KP_CHS226 | KP_MGH84       | KP_WGLW3      |
| KP_CG43          | KP_CHS228 | KP_MGH89       | KP_XH209      |
| KP_CHS101        | KP_CHS229 | KP_MGH90       | KP_blaNDM-1   |
| KP_CHS102        | KP_CHS230 | KP_MGH94       | KP_rh_SB3432  |
| KP_CHS104        | KP_CHS231 | KP_MGH96       | KP_yzusk-4    |
| KP_CHS105        | KP_CHS232 | KP_MGH_18      |               |

**Table S3:** List of NCBI accessions for CC258 *K. pneumoniae* included for comparison (Figure S3).

|              |            |            |            |
|--------------|------------|------------|------------|
| SAMN01057606 | SRR1166990 | SRR1561228 | SRR1561301 |
| SAMN01057607 | SRR1166991 | SRR1561231 | SRR1561302 |
| SAMN01057608 | SRR1166992 | SRR1561232 | SRR1561303 |
| SAMN01057609 | SRR1166993 | SRR1561233 | SRR1561305 |
| SAMN01057611 | SRR1166994 | SRR1561234 | SRR1561306 |
| SAMN01057612 | SRR1166995 | SRR1561235 | SRR1561308 |
| SAMN01057613 | SRR1166996 | SRR1561237 | SRR1561309 |
| SAMN01057614 | SRR1166997 | SRR1561239 | SRR1561311 |
| SAMN01057620 | SRR1166998 | SRR1561240 | SRR1561312 |
| SAMN01057621 | SRR1166999 | SRR1561241 | SRR1561313 |
| SAMN01057635 | SRR1167000 | SRR1561242 | SRR1561315 |
| SAMN01057638 | SRR1167001 | SRR1561243 | SRR1561316 |
| SAMN01057640 | SRR1167002 | SRR1561244 | SRR1561317 |
| SAMN01057641 | SRR1167003 | SRR1561245 | SRR1561318 |
| SAMN01057646 | SRR1167004 | SRR1561246 | SRR1561320 |
| SAMN01057650 | SRR1167005 | SRR1561247 | SRR1561321 |
| SAMN01057652 | SRR1167006 | SRR1561248 | SRR1561322 |
| SAMN01057657 | SRR1167007 | SRR1561249 | SRR1561327 |
| SAMN01057658 | SRR1167008 | SRR1561251 | SRR1561328 |
| SAMN01057711 | SRR1167009 | SRR1561252 | SRR1561329 |
| SAMN02786855 | SRR1167010 | SRR1561253 | SRR1561330 |
| SRR1166945   | SRR1167011 | SRR1561254 | SRR1561331 |
| SRR1166946   | SRR1167012 | SRR1561255 | SRR1561332 |
| SRR1166947   | SRR1167013 | SRR1561256 | SRR1561333 |
| SRR1166948   | SRR1167014 | SRR1561257 | SRR1561334 |
| SRR1166949   | SRR1167015 | SRR1561258 | SRR1561336 |
| SRR1166950   | SRR1167016 | SRR1561259 | SRR1561339 |
| SRR1166951   | SRR1167017 | SRR1561260 | SRR1561341 |
| SRR1166952   | SRR1167018 | SRR1561261 | SRR1561342 |
| SRR1166953   | SRR1167019 | SRR1561262 | SRR1561343 |
| SRR1166954   | SRR1167020 | SRR1561263 | SRR1561344 |
| SRR1166955   | SRR1167021 | SRR1561264 | SRR1561345 |
| SRR1166956   | SRR1167022 | SRR1561265 | SRR1561346 |
| SRR1166957   | SRR1167023 | SRR1561266 | SRR1561347 |
| SRR1166958   | SRR1167024 | SRR1561267 | SRR1561349 |
| SRR1166959   | SRR1167025 | SRR1561268 | SRR1561350 |
| SRR1166960   | SRR1167026 | SRR1561269 | SRR1561351 |
| SRR1166961   | SRR1167027 | SRR1561270 | SRR1561352 |
| SRR1166962   | SRR1167028 | SRR1561271 | SRR1561353 |
| SRR1166963   | SRR1561198 | SRR1561272 | SRR1561354 |
| SRR1166964   | SRR1561199 | SRR1561273 | SRR1561355 |
| SRR1166965   | SRR1561200 | SRR1561274 | SRR1561356 |
| SRR1166966   | SRR1561201 | SRR1561275 | SRR1561360 |
| SRR1166967   | SRR1561202 | SRR1561276 | SRR1561363 |
| SRR1166968   | SRR1561203 | SRR1561277 | SRR1561364 |
| SRR1166969   | SRR1561204 | SRR1561278 | SRR1582856 |
| SRR1166970   | SRR1561205 | SRR1561279 | SRR1582857 |
| SRR1166971   | SRR1561206 | SRR1561280 | SRR1582862 |
| SRR1166972   | SRR1561207 | SRR1561281 | SRR1582863 |
| SRR1166973   | SRR1561208 | SRR1561282 | SRR1582864 |
| SRR1166974   | SRR1561209 | SRR1561283 | SRR1582865 |
| SRR1166975   | SRR1561210 | SRR1561284 | SRR1582866 |
| SRR1166976   | SRR1561211 | SRR1561285 | SRR1582867 |
| SRR1166977   | SRR1561215 | SRR1561286 | SRR1582868 |
| SRR1166978   | SRR1561216 | SRR1561287 | SRR1582870 |
| SRR1166979   | SRR1561217 | SRR1561288 | SRR1582871 |
| SRR1166980   | SRR1561218 | SRR1561289 | SRR2033747 |
| SRR1166981   | SRR1561219 | SRR1561290 | SRR2033748 |
| SRR1166982   | SRR1561220 | SRR1561291 | SRR2033756 |
| SRR1166983   | SRR1561221 | SRR1561292 | SRR2033781 |
| SRR1166984   | SRR1561222 | SRR1561293 | SRR2033783 |
| SRR1166985   | SRR1561223 | SRR1561294 | SRR2033784 |
| SRR1166986   | SRR1561224 | SRR1561295 | SRR2033785 |
| SRR1166987   | SRR1561225 | SRR1561296 | SRR2033787 |
| SRR1166988   | SRR1561226 | SRR1561297 |            |
| SRR1166989   | SRR1561227 | SRR1561298 |            |

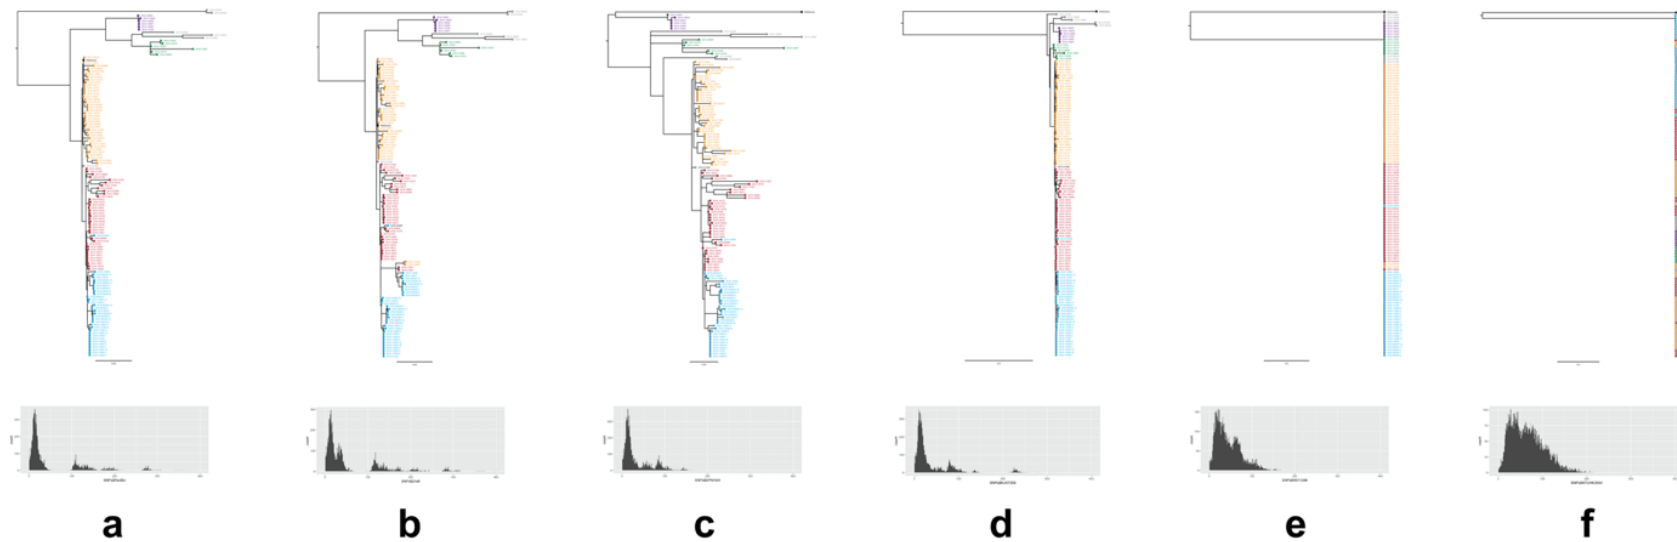

**Figure S1a:** Effect of different reference genome selection on phylogenetic structure:

- a) Closed genome assembly of PacBio-sequenced local *K. pneumoniae* isolate
- b) Draft genome assembly of Illumina-sequenced local *K. pneumoniae* isolate
- c) KPNIH24 – GenBank genome, same clade I (based on capsular locus type) CC258 *K. pneumoniae*
- d) NJST258\_1 – GenBank genome, clade II CC258 *K. pneumoniae*
- e) HS11286 – GenBank genome, ST11 *K. pneumoniae* (ancestral clone to ST258; shares six MLST alleles)
- f) NTUH-K2044 – GenBank genome, ST23 *K. pneumoniae*

Each phylogenetic tree represents the same group of isolates, with each tree inferred from an alignment of core-genome SNPs using each of the respective reference genomes using identical methods. Tree tips have been coloured as follows:

Genomic cluster A (green), cluster B1 (orange), cluster B2 (red), cluster C (purple); within-host diversity isolates from patient 70 (blue).

Histograms below show distribution of pairwise SNP distances (as in Figure S5a) using each respective reference genome.

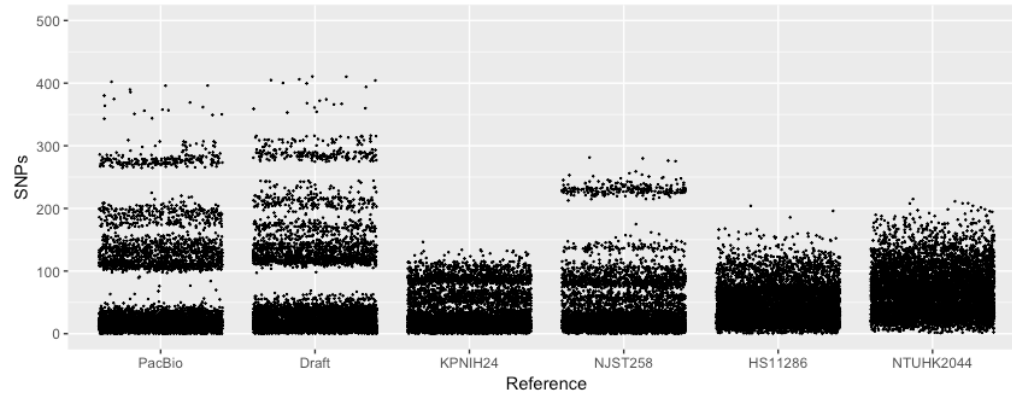

**Figure S1b:** Scatterplots of the pairwise SNP distances corresponding to each of the reference genomes used.

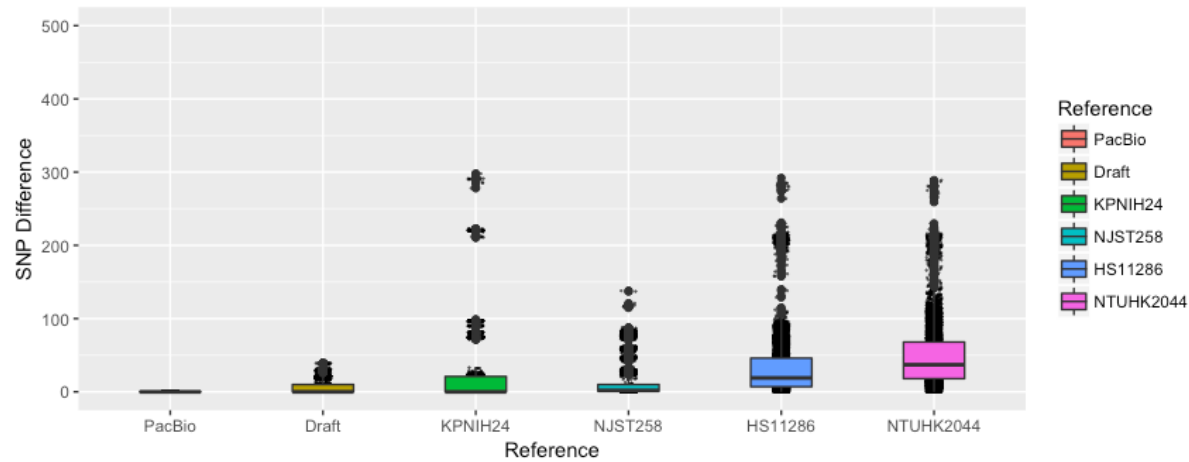

**Figure S1c:** Difference in reported pairwise SNP distance for each pair of isolates using different reference genomes compared to using the PacBio assembled internal reference genome. Boxes show median difference and interquartile ranges.

**Table S4:** KPC-producing Enterobacteriaceae isolates until 31 December 2015

| <b>Species (and sequence type [ST])</b>    |                       |
|--------------------------------------------|-----------------------|
| <i>Klebsiella pneumoniae</i>               |                       |
| ST16                                       | 1                     |
| ST39                                       | 1                     |
| ST147                                      | 2                     |
| ST258                                      | 73                    |
| ST1048                                     | 1                     |
| Novel ST <sup>a</sup>                      | 1                     |
| <i>Klebsiella oxytoca</i>                  |                       |
| ST146                                      | 1                     |
| <i>Citrobacter farmeri</i>                 | 5                     |
| <i>Citrobacter freundii</i>                | 1                     |
| <b>Specimen source</b>                     |                       |
| Blood                                      | 10 (12%)              |
| Urine                                      | 42 (49%)              |
| Sputum                                     | 4 (5%)                |
| Aspirate fluid                             | 4 (5%)                |
| Wound swab                                 | 2 (2%)                |
| Tissue                                     | 2 (2%)                |
| Rectal swab / Faeces                       | 20 (23%)              |
| Other <sup>b</sup>                         | 2 (2%)                |
| <b>Antibiotic resistance <sup>c</sup></b>  |                       |
| <i>K. pneumoniae</i> (n = 58)              |                       |
| Meropenem                                  | 57 (98%) <sup>d</sup> |
| Amikacin                                   | 55 (95%)              |
| Gentamicin                                 | 44 (76%)              |
| Ciprofloxacin                              | 57 (98%)              |
| Trimethoprim-Sulfamethoxazole              | 46 (79%)              |
| <i>C. farmeri</i> (n = 4)                  |                       |
| Meropenem                                  | 4 (100%)              |
| Amikacin                                   | 4 (100%)              |
| Gentamicin                                 | 4 (100%)              |
| Ciprofloxacin                              | 3 (75%)               |
| Trimethoprim-Sulfamethoxazole              | 4 (100%)              |
| <b>Carbapenemase gene present (by WGS)</b> |                       |
| KPC-2                                      | 83 (97%) <sup>d</sup> |
| KPC-3                                      | 2 (2%)                |

<sup>a</sup> Novel *tonB* allele and allele combination (non CC258)

<sup>b</sup> Other = pharyngeal swab (n = 1), unknown (n = 1)

<sup>c</sup> Resistance or intermediate resistance present by Clinical and Laboratory Standards Institute (CLSI) breakpoints

<sup>d</sup> One ST258 isolate initially tested resistant to meropenem, but was susceptible on repeat testing and found to lack *bla*KPC-2

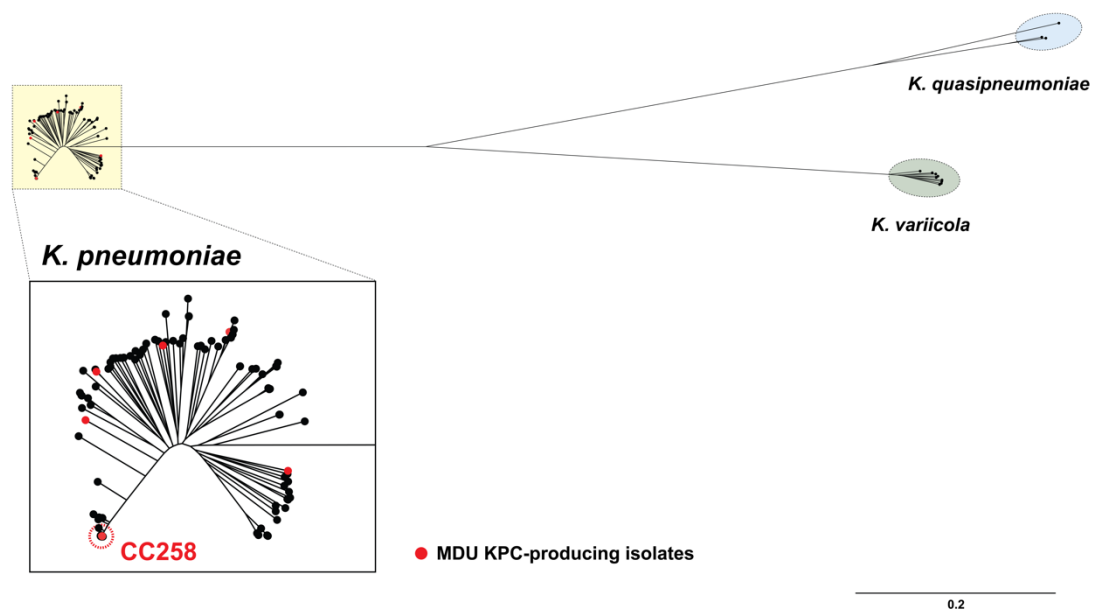

**Figure S2:** Approximate maximum likelihood tree showing comparison between KPC-producing *K. pneumoniae* isolates referred to MDU and publicly available *K. pneumoniae* genomes in GenBank. The tree was inferred from an alignment of core genome SNPs using *FastTree* v2.1.8 [2]. Genomes of local isolates referred to MDU are shown in red, including 29 CC258 isolates (circled).



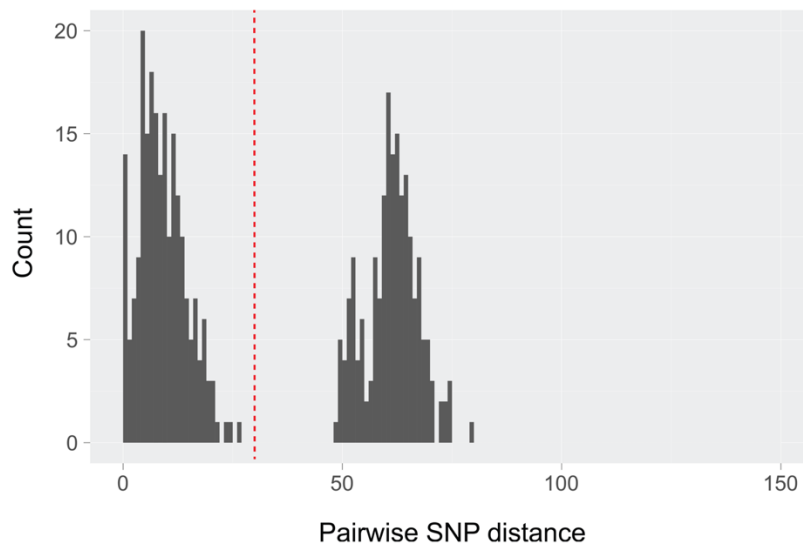

a)

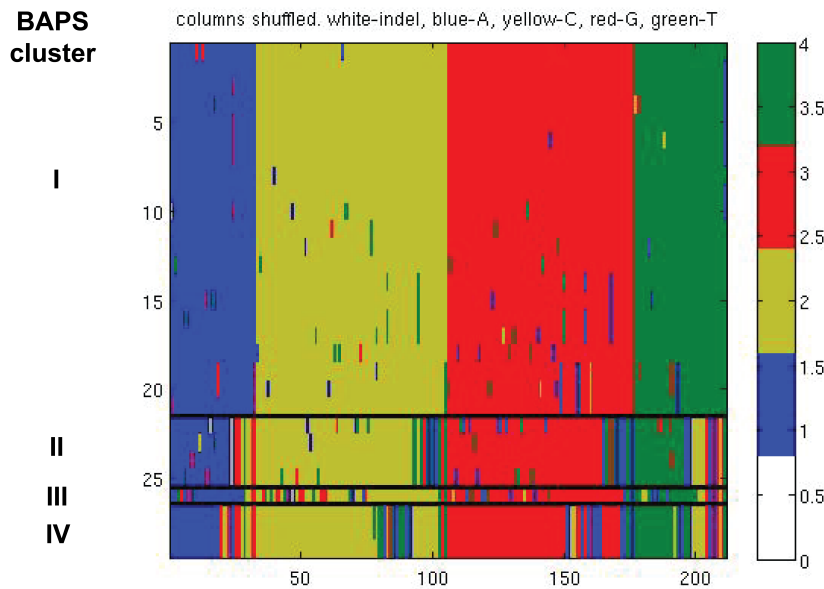

b)

**Figure S4:** Support for defining genomic clusters. **a)** Histogram of pairwise SNP distances between each pair of isolates in the initial genomic analysis showing a binomial distribution. Assuming the pairwise SNP distance between isolates in the same cluster is lower than the SNP distance between two isolates in different clusters, a threshold distance of 30 SNPs (red dashed line) applied to the initial phylogeny shown in Figure 3 identified three distinct clusters (labelled A, B, C). **b)** Bayesian Analysis of Population Structure (BAPS) analysis using hierarchical BAPS [3], with clustering performed iteratively to 8 levels in the hierarchy, and the maximum number of clusters prior set at 10. Four BAPS clusters were identified, corresponding to the 3 major clades (A, B, C) shown in Figure 3 in addition to a single outlier.

**Table S5:** Demographic and clinical characteristics, KPC-2 positive CC258 *K. pneumoniae* colonised patients, Victoria, categorised by genomic cluster assignment.

|                                                       | Cluster        |                            |                           |                | Unclustered<br>(n=4) | Total (n=57)    |
|-------------------------------------------------------|----------------|----------------------------|---------------------------|----------------|----------------------|-----------------|
|                                                       | A (n=4)        | B1 (n=28)                  | B2 (n=16)                 | C (n=5)        |                      |                 |
| Age, yrs (median, range)                              | 76 (74-83)     | 67 (20-90)                 | 81 (52-95)                | 74 (58-78)     | 82 (73-88)           | 74 (20-95)      |
| Male (n, %)                                           | 1 (25)         | 14 (50)                    | 11 (69)                   | 3 (60)         | 4 (100)              | 33 (58)         |
| Year first isolate identified                         | 2012           | 2012                       | 2013                      | 2014           | 2014                 |                 |
| <b>Colonised patients</b>                             | <b>0 (0)</b>   | <b>4 (7)</b>               | <b>9 (56)</b>             | <b>2 (40)</b>  | <b>3 (75)</b>        | <b>18 (32)</b>  |
| <b>Infected patients (n, %)</b>                       | <b>4 (100)</b> | <b>22 (79)<sup>b</sup></b> | <b>5 (31)<sup>b</sup></b> | <b>3 (60)</b>  | <b>1 (25)</b>        | <b>35 (61)</b>  |
| Site of infection                                     |                |                            |                           |                |                      |                 |
| Urinary tract                                         | 4 (100)        | 13 (46)                    | 4 (14)                    | 2 (40)         | 1 (25)               | 24 (42)         |
| Intrabdominal                                         | -              | 5 (18)                     | -                         | -              | -                    | 5 (9)           |
| Pulmonary & pleural                                   | -              | 3 (11)                     | 1 (4)                     | -              | -                    | 4 (7)           |
| Intravascular line-related                            | -              | 1 (4)                      | -                         | -              | -                    | 1 (2)           |
| Skin/soft tissue                                      | -              | -                          | -                         | 1 (4)          | -                    | 1 (2)           |
| Sepsis syndrome                                       | 1 (25)         | 15 (54)                    | 3 (19)                    | 2 (40)         | 1 (25)               | 22 (39)         |
| <b>Comorbidities</b>                                  |                |                            |                           |                |                      |                 |
| Kidney/renal disease                                  | 2 (50)         | 15 (54)                    | 12 (75)                   | 1 (20)         | 1 (25)               | 31 (54)         |
| Type 2 diabetes                                       | 2 (50)         | 7 (25)                     | 8 (50)                    | 1 (20)         | -                    | 18 (32)         |
| Liver disease                                         | 1 (25)         | 10 (36)                    | 1 (6)                     | -              | -                    | 12 (21)         |
| Prior chemo/radiotherapy                              | -              | 7 (25)                     | 16 (13)                   | -              | 1 (25)               | 10 (18)         |
| Antibiotic therapy > 1 month                          | 2 (50)         | 8 (29)                     | 5 (31)                    | 3 (60)         | 1 (25)               | 19 (33)         |
| <b>Hospitalisation in prior 12 months</b>             | <b>4 (100)</b> | <b>28 (100)</b>            | <b>16 (100)</b>           | <b>5 (100)</b> | <b>4 (100)</b>       | <b>57 (100)</b> |
| Healthcare Facility I                                 | 3 (75)         | -                          | -                         | -              | -                    | 3 (5)           |
| Healthcare Facility F                                 | -              | 23 (82)                    | 16 (100)                  | -              | -                    | 39 (68)         |
| Healthcare Facility A                                 | -              | -                          | -                         | 4 (80)         | -                    | 4 (7)           |
| <b>Overseas travel in prior 12 months<sup>c</sup></b> | <b>-</b>       | <b>1 (4)</b>               | <b>1 (6)</b>              | <b>2 (40)</b>  | <b>4 (100)</b>       | <b>8 (14)</b>   |
| Country of travel <sup>a</sup>                        |                |                            |                           |                |                      |                 |
| Greece                                                | -              | -                          | -                         | 1 (20)         | 4 (100)              | 5 (9)           |
| New Zealand                                           | -              | 1 (4)                      | -                         | -              | -                    | 1 (2)           |
| Vietnam                                               | -              | -                          | 1 (6)                     | 1 (20)         | -                    | 2 (4)           |
| Thailand                                              | -              | -                          | -                         | 1 (20)         | -                    | 1 (2)           |
| Hong Kong                                             | -              | -                          | -                         | 1 (20)         | -                    | 1 (2)           |
| Overseas hospitalisation                              | -              | -                          | -                         | 2 (40)         | 4 (100)              | 6 (11)          |

<sup>a</sup> Sum may exceed total where patients report multiple travel destinations

<sup>b</sup> Infection/colonisation status unknown for some patients

<sup>c</sup> Travel history unknown for 11 patients

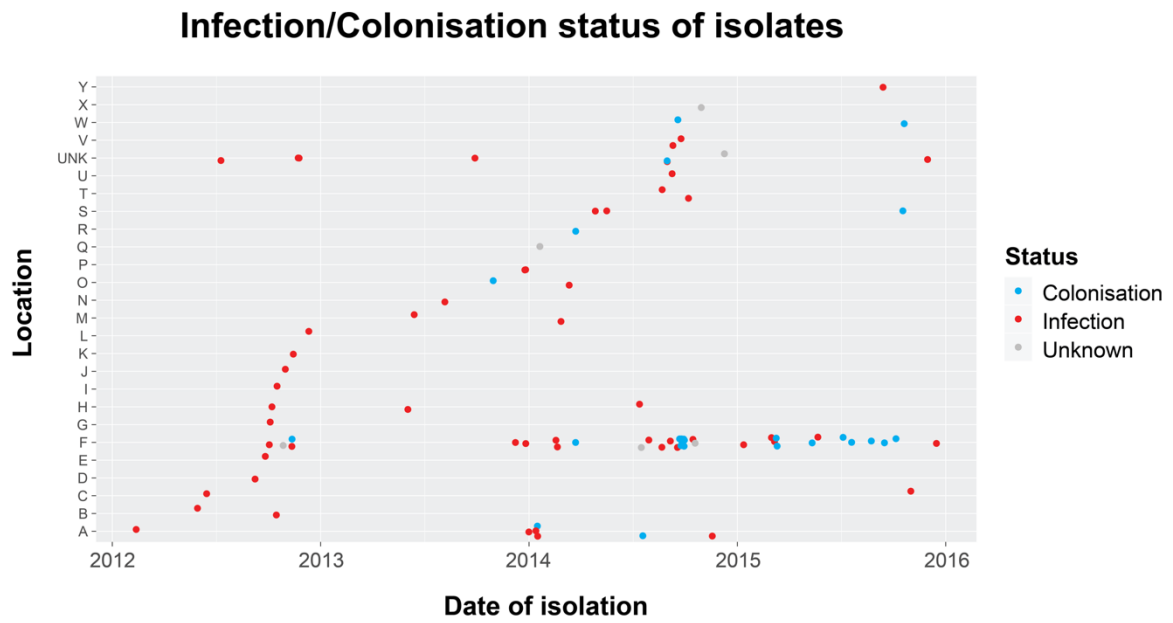

**Figure S5:** Infection/colonisation status of KPC-producing isolates, by date and location of isolation. Data were plotted in R using ggplot2.

## Supplementary epidemiological data

A total of 113 requests for patient hospitalisation data from forty-one separate healthcare facilities were made, 105 (93%) of which were able to be filled. Data were gathered on 2165 healthcare presentations. Interviews with the general practitioner, or alternate practice staff member, was completed for 48/57 (84%) of patients. Two patients had no record of a general practitioner. The remaining seven general practitioners were unable to be contacted. Patient or next of kin interviews were completed for 46/57 (81%) of patients, 11 of which were conducted with the patient and 34 with one or more next of kin. Of the remaining 11 patients, four were unable to be contacted, two refused to give information despite successful contact, three were deemed not for contact by their general practitioner and two were deceased or experiencing severe communication difficulties and without identifiable next of kin living in Australia.

Data on patient sex, overseas travel and recent hospitalisation are shown in Supplementary Table S5. Country of birth was known for 51/57 (89%) of patients. Of those, 20 (39%) were born in Australia, 9 (16%) were born in Italy, and 8 (14%) in Greece. Year of arrival in Australia was known for 20 of the 31 patients born overseas and ranged from 1950 to 2000 (mean 1965). Only one patient, born in New Zealand, had migrated to Australia since the emergence of KPC in 1996. Of those that had travelled, the most common overseas destinations were Greece (n=6) and Italy (n=6), also corresponding with the most common overseas countries of birth. Of the eight patients that had travelled in the 12 months prior to isolation, six had been hospitalised overseas, five in Greece and one in both Vietnam and Thailand. All patients with isolates that did not fall into one of the major local phylogenetic clades reported overseas hospitalisation in the 12 months prior.

Based on clinical record review, colonisation (in the absence of recognised infection) was the probable manifestation for 18 of the 57 patients (32%) with a ST258 KPC-2 *K. pneumoniae* isolate in Victoria. In a further 35 (61%) patients, clinical notes either directly stated *K. pneumoniae* as the cause of infection, or detailed an illness clinically compatible with the site of specimen at the time of collection. Of those with symptomatic infection, the most common site of infection was urinary tract (n=24, 42%), followed by intra-abdominal (n=5, 9%) and pulmonary and pleural infection (n=4, 7%), with skin and soft tissue and intra-vascular line related infection each occurring in one patient. Twenty-two patients (39%) had a sepsis syndrome. The clinical significance of the KPC-producing isolate in the remaining four patients was unknown. Directed antimicrobial treatment for infection due to a KPC-producing organism was commenced in 25 (71%) of the 35 symptomatically infected patients. One patient with a skin and soft tissue infection was treated surgically. In two patients, medical notes state that directed treatment was withheld due to palliative intent. The proportion of cases with symptomatic infection appeared to vary between the genomic clusters, and may be

reflective of screening practices in different facilities, though numbers were small and not significantly different ( $p = 0.208$ , Fisher's Exact Test).

Data were collected on comorbidities, though no significant associations were identified. Renal disease was the most commonly reported comorbidity (54%), though may have just reflected the age of the study population. At least 30 patients (53%) had an indwelling medical device (excluding peripherally inserted intravenous canulas) at the time of first isolation, including urinary catheters, central venous catheters, and surgical drains – known risk factors for KPC acquisition [1]. The most common indwelling medical device was a urinary catheter in 13 of the 57 patients (23%), followed by eight patients found to have ureteric, biliary or renal stents; however six of these eight patients (75%) had isolates from genomic cluster B1 and were thought to reflect admission to a location of transmission, rather than risk of KPC acquisition itself.

Information on residence at aged care facilities was available for 53 of the 57 patients, of which 12 (23%) are believed to have resided in an aged care facility at any time. Dates of residence were known for 11 of the 12 patients, with only three residing in the aged care facility prior to first KPC-2 producing *K. pneumoniae* detection. No aged care facility was reported as a location of residence for more than one patient.

Amongst those who were inpatients on the day of collection of their first KPC-2 producing *K. pneumoniae* specimen, and for whom data was available, the median time from admission to detection was seven days (range 0-93 days). After excluding patients where specimen collection was within 48 hours of admission, the median time from admission to isolation was 17 days (range 3-93,  $n=33$ ). Median number of inpatient days in Australian hospitals, in the 12 months prior to admission, for all patients was 62 days (range 1-182). Four patients had fewer than ten Australian inpatient days in the 12 months prior to first KPC-2 producing *K. pneumoniae* isolation. Of these four patients, three had been hospitalised overseas in the 12 months prior, for which exact dates and duration of hospitalisation is not known. The relationships between genomic cluster and the healthcare facilities to which patients presented in the 12 months prior to their first known KPC-2 producing *K. pneumoniae* detection are apparent in the data (Table S5). Significant differences exist in the proportion presenting to the selected healthcare services amongst genomic cluster A (Cochrane's Q test,  $p<0.001$ ), genomic cluster B ( $p<0.001$ ), genomic cluster C ( $p<0.001$ ) and genomic cluster D ( $p<0.001$ ). No such differences existed in isolates classified as "other" (Cochrane's Q test,  $p=0.273$ ).

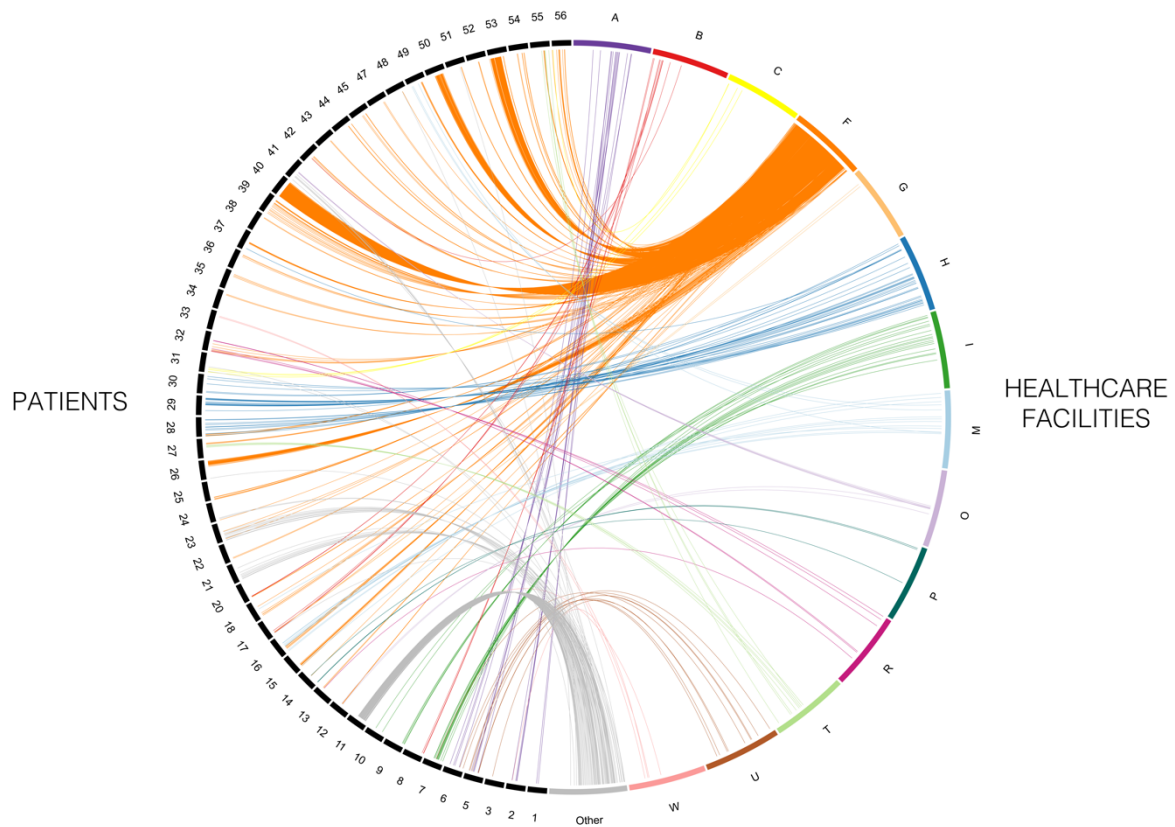

**Figure S6:** Unordered patient admission data from the investigation, showing patient movements among healthcare facilities. Coloured bands linking patients (left) to healthcare facilities (right) represent separate healthcare admissions, with the width of the band corresponding to the duration of the admission. The figure was drawn using Circos v0.67.

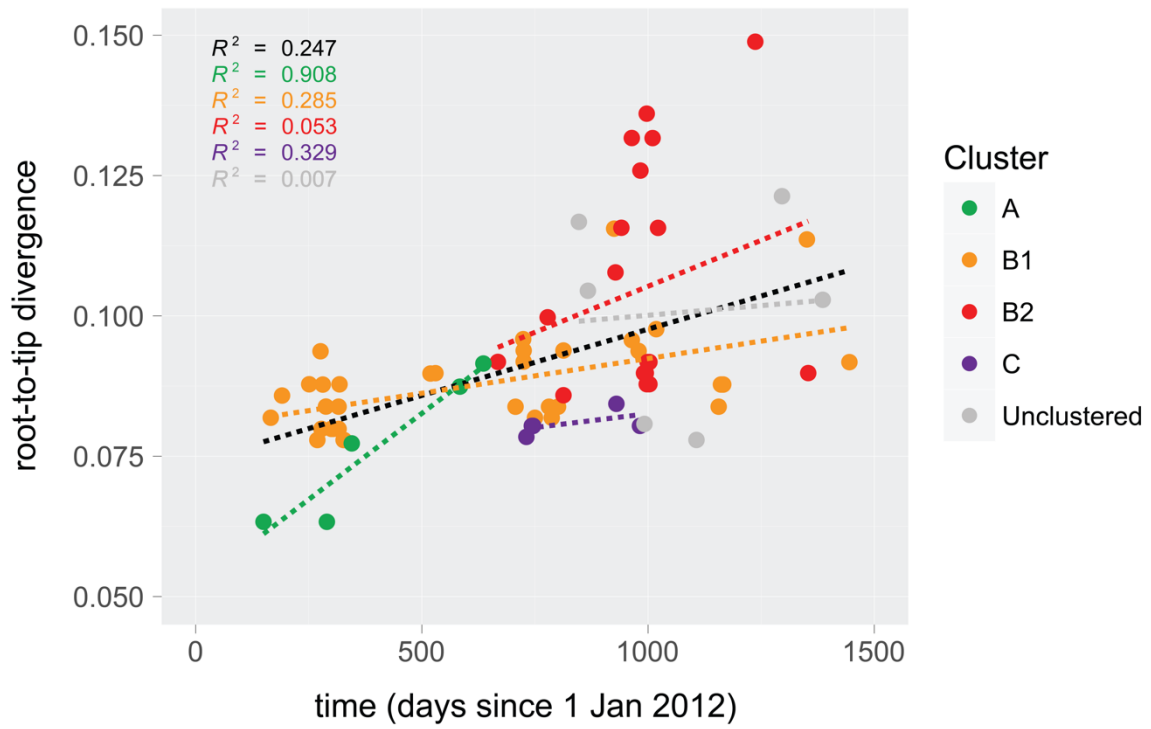

**Figure S7:** Temporal signal based on root-to-tip divergence. Data were generated using *TempEst* v1.5 [4] on SNPs filtered for recombination and plotted in R using ggplot2. The coloured regression lines and corresponding  $R^2$  values indicate the signal for individual clades. Overall (black line), there was a poor temporal signal when comparing root-to-tip distance and date of isolate collection, with  $R^2 = 0.247$ . However, this may be in part due to clade-specific molecular clocks, with better correlation within individual clades.

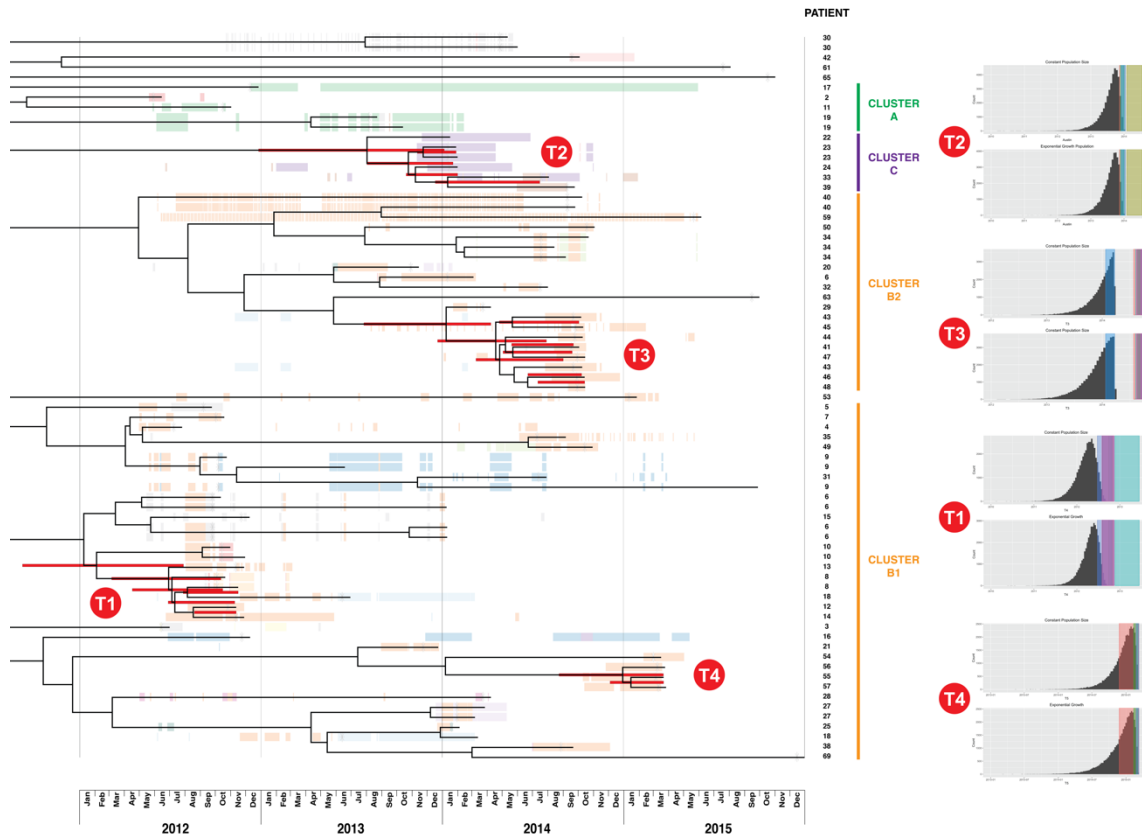

**Figure S8:** Posterior probability distributions for each MRCA of four primary transmission networks (T1-T4). The shaded regions behind the phylogenetic tree are coloured by healthcare facility, and indicate patient admissions over time. The corresponding distributions on the right show posterior distributions for the common ancestor nodes of each transmission network using constant and exponential population tree priors. Coloured regions indicate the period of time from hospital admission for each patient until first isolation of a KPC-producing organism. Posterior probabilities for the MRCA for the transmission networks, T3 and T4, fell within the period that an index patient was in hospital, whereas for T1 and T2, most of the distribution preceded the patient admissions. This suggested the index isolate for each of those networks was possibly acquired by a patient prior to the documented admission (for example, the recent overseas hospitalisations of patients 22 and 23 in T2 – see Figure 6), or was derived from an unsampled individual or environmental source.

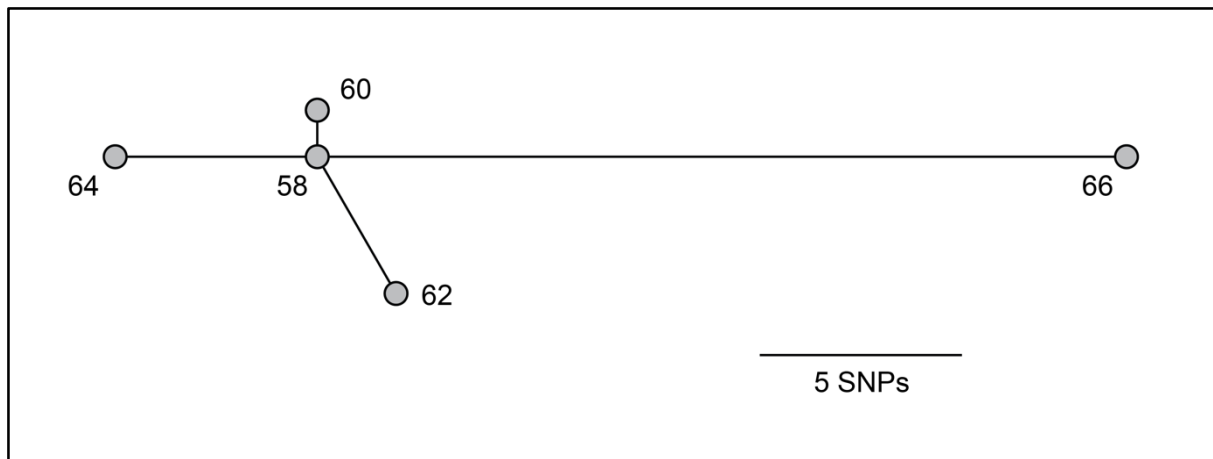

**Figure S9:** Neighbour-joining phylogeny of the five *Citrobacter farmeri* isolates, inferred from core genome SNPs in chromosomal sites. Nodes are labelled by patient. SNPs were called from mapping sequencing reads for each isolate against a PacBio sequenced genome from patient 60. The core genome comprised 97% of the total sites in the reference genome. No recombinant regions were detected.

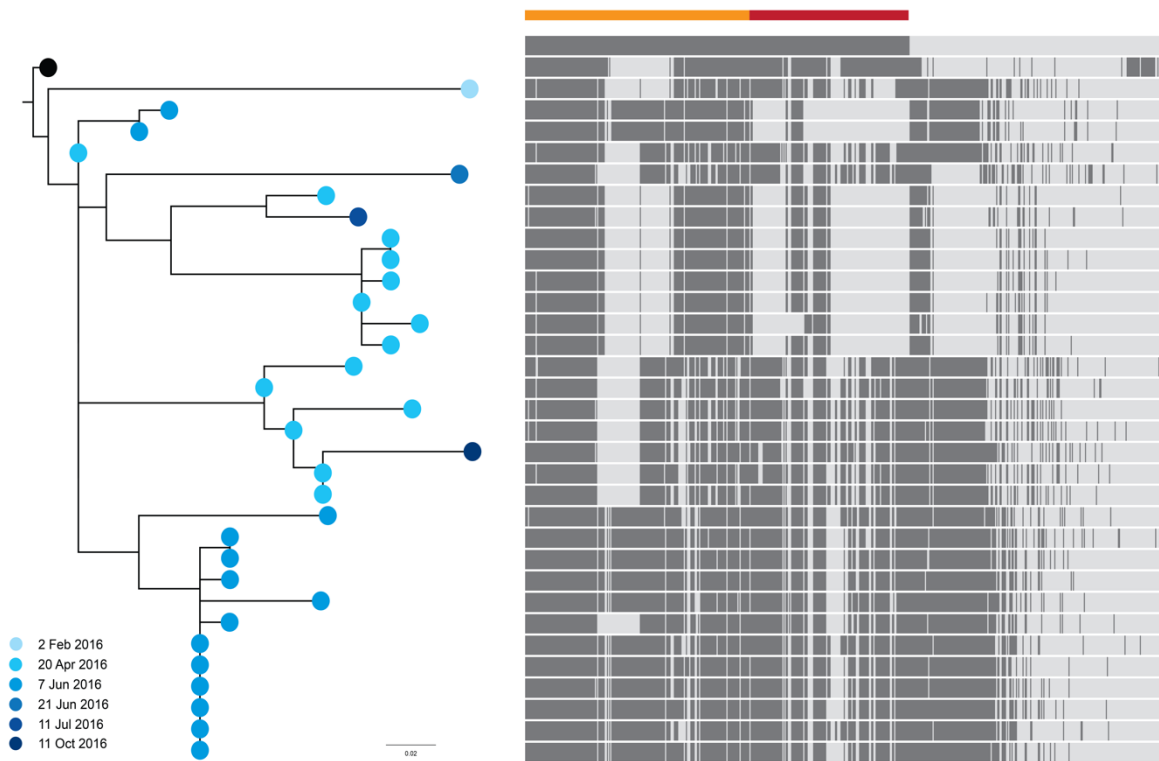

**Figure S10:** Maximum likelihood phylogeny and accessory genome comparison of the 32 isolates from patient 70 (nodes coloured in shades of blue, as in Figure 10), in comparison to two isolates from the suspected transmission source (black). The accessory genome is displayed on the right as a heatmap, with each row corresponding to the isolate represented in the phylogenetic tree on the left. Gene presence in the heatmap is shown as a vertical dark grey line, with light grey regions representing gene absence. Genes in the heatmap have been ordered in accordance with two plasmids (orange and red bars) in one of the isolates from the suspected source.

**Table S6:** Factors contributing to KPC transmission and measures undertaken to control ongoing transmission

| Factors identified by infection control staff contributing to KPC transmission                                                                                                                                                                                                                                                                                                                                                                                                                                                                                                                                                                  | Bundled measures undertaken in every instance where ongoing transmission was halted                                                                                                                                                                                 |
|-------------------------------------------------------------------------------------------------------------------------------------------------------------------------------------------------------------------------------------------------------------------------------------------------------------------------------------------------------------------------------------------------------------------------------------------------------------------------------------------------------------------------------------------------------------------------------------------------------------------------------------------------|---------------------------------------------------------------------------------------------------------------------------------------------------------------------------------------------------------------------------------------------------------------------|
| <ul style="list-style-type: none"> <li>• Missed identification of patient contacts e.g. only room contacts screened, with subsequent transmission to other contacts on the same ward</li> <li>• Absence of permanent patient alerts for discharged patient contacts, or colonised patients</li> <li>• Environmental contamination of patient bathrooms</li> <li>• Shared bathrooms for colonised patients, due to the unavailability of single bathroom facilities</li> <li>• Lack of a central colonised patient registry, and inability of healthcare facilities to identify KPC colonised patients identified at other facilities</li> </ul> | <ul style="list-style-type: none"> <li>• Use of contact screening</li> <li>• Enhanced cleaning</li> <li>• Isolation of cases in contact precautions requiring staff use of personal protective equipment (gloves and gown) and promotion of hand hygiene</li> </ul> |
|                                                                                                                                                                                                                                                                                                                                                                                                                                                                                                                                                                                                                                                 | Bundled measures undertaken in some instances where ongoing transmission was halted                                                                                                                                                                                 |
|                                                                                                                                                                                                                                                                                                                                                                                                                                                                                                                                                                                                                                                 | <ul style="list-style-type: none"> <li>• Staff cohorting</li> <li>• Screening of patient transfers</li> <li>• Notification of KPC cases and contacts to receiving facilities</li> <li>• Environmental screening &amp; decontamination</li> </ul>                    |

## References

1. Tumbarello M, Trecarichi EM, Tumietto F, Del Bono V, De Rosa FG, Bassetti M, et al. Predictive models for identification of hospitalized patients harboring KPC-producing *Klebsiella pneumoniae*. *Antimicrob Agents Chemother*. 2014;58(6):3514-20. doi: 10.1128/AAC.02373-13. PubMed PMID: 24733460; PubMed Central PMCID: PMC4068482.
2. Price MN, Dehal PS, Arkin AP. FastTree 2--approximately maximum-likelihood trees for large alignments. *PLoS One*. 2010;5(3):e9490. doi: 10.1371/journal.pone.0009490. PubMed PMID: 20224823; PubMed Central PMCID: PMC2835736.
3. Cheng L, Connor TR, Siren J, Aanensen DM, Corander J. Hierarchical and spatially explicit clustering of DNA sequences with BAPS software. *Mol Biol Evol*. 2013;30(5):1224-8. doi: 10.1093/molbev/mst028. PubMed PMID: 23408797; PubMed Central PMCID: PMC3670731.
4. Rambaut A, Lam TT, Max Carvalho L, Pybus OG. Exploring the temporal structure of heterochronous sequences using TempEst (formerly Path-O-Gen). *Virus Evol*. 2016;2(1):vew007. doi: 10.1093/ve/vew007. PubMed PMID: 27774300; PubMed Central PMCID: PMC4989882.
5. Endimiani A, Carias LL, Hujer AM, Bethel CR, Hujer KM, Perez F, et al. Presence of plasmid-mediated quinolone resistance in *Klebsiella pneumoniae* isolates possessing blaKPC in the United States. *Antimicrob Agents Chemother*. 2008;52(7):2680-2. doi: 10.1128/AAC.00158-08. PubMed PMID: 18426899; PubMed Central PMCID: PMC2443894.
6. Poirel L, Heritier C, Tolun V, Nordmann P. Emergence of oxacillinase-mediated resistance to imipenem in *Klebsiella pneumoniae*. *Antimicrob Agents Chemother*. 2004;48(1):15-22. PubMed PMID: 14693513; PubMed Central PMCID: PMC310167.
7. Pitout JD, Gregson DB, Poirel L, McClure JA, Le P, Church DL. Detection of *Pseudomonas aeruginosa* producing metallo-beta-lactamases in a large centralized laboratory. *J Clin Microbiol*. 2005;43(7):3129-35. doi: 10.1128/JCM.43.7.3129-3135.2005. PubMed PMID: 16000424; PubMed Central PMCID: PMC1169086.
8. Mushtaq S, Irfan S, Sarma JB, Doumith M, Pike R, Pitout J, et al. Phylogenetic diversity of *Escherichia coli* strains producing NDM-type carbapenemases. *J Antimicrob Chemother*. 2011;66(9):2002-5. doi: 10.1093/jac/dkr226. PubMed PMID: 21669947.
9. Yan JJ, Hsueh PR, Ko WC, Luh KT, Tsai SH, Wu HM, et al. Metallo-beta-lactamases in clinical *Pseudomonas* isolates in Taiwan and identification of VIM-3, a novel variant of the VIM-2 enzyme. *Antimicrob Agents Chemother*. 2001;45(8):2224-8. doi: 10.1128/AAC.45.8.2224-2228.2001. PubMed PMID: 11451678; PubMed Central PMCID: PMC90635.
10. Hornsey M, Phee L, Wareham DW. A novel variant, NDM-5, of the New Delhi metallo-beta-lactamase in a multidrug-resistant *Escherichia coli* ST648 isolate recovered from a patient in the

- United Kingdom. *Antimicrob Agents Chemother.* 2011;55(12):5952-4. doi: 10.1128/AAC.05108-11. PubMed PMID: 21930874; PubMed Central PMCID: PMC3232805.
11. Perez-Perez FJ, Hanson ND. Detection of plasmid-mediated AmpC beta-lactamase genes in clinical isolates by using multiplex PCR. *J Clin Microbiol.* 2002;40(6):2153-62. PubMed PMID: 12037080; PubMed Central PMCID: PMC130804.
  12. Woodford N, Ellington MJ, Coelho JM, Turton JF, Ward ME, Brown S, et al. Multiplex PCR for genes encoding prevalent OXA carbapenemases in *Acinetobacter* spp. *Int J Antimicrob Agents.* 2006;27(4):351-3. doi: 10.1016/j.ijantimicag.2006.01.004. PubMed PMID: 16564159.
  13. Turton JF, Ward ME, Woodford N, Kaufmann ME, Pike R, Livermore DM, et al. The role of ISAbal in expression of OXA carbapenemase genes in *Acinetobacter baumannii*. *FEMS Microbiol Lett.* 2006;258(1):72-7. doi: 10.1111/j.1574-6968.2006.00195.x. PubMed PMID: 16630258.
